# Supplementary material for: Theoretical and experimental studies of an oseltamivir–triazole-based thermoresponsive organogel
Source: Royal Society of Chemistry journal article supplement (doi:10.1039/c9ra02463h), 2019-01-01
Supplement: c9ra02463h1.pdf [file c9ra02463h1.pdf]

## Theoretical and Experimental Studies of Oseltamivir-triazole Based Thermoresponsive Organogel

Sumit Kumar<sup>1,2,†</sup>, Lidong Wu<sup>3,4,†</sup>, Neha Sharma<sup>1,†</sup>, Ayushee<sup>1</sup>, Kumar Kaushik<sup>5</sup>, Maria Grishina<sup>6</sup>, Bhupendra S Chhikara<sup>7</sup>, Poonam<sup>2,\*</sup>, Vladimir Potemkin<sup>6,\*</sup>, Brijesh Rathi<sup>1,\*</sup>

<sup>1</sup>Laboratory for Translational Chemistry and Drug Discovery, Department of Chemistry, Hansraj College University Enclave, University of Delhi, Delhi 110007 India

<sup>2</sup>Department of Chemistry, Miranda House, University of Delhi, Delhi 110007 India

<sup>3</sup>Department of Chemistry, Massachusetts Institute of Technology, Cambridge, Massachusetts 02139, United States

<sup>4</sup>Key Laboratory of Control of Quality and Safety for Aquatic Products, Ministry of Agriculture, Chinese Academy of Fishery Sciences, Beijing 100141, China

<sup>5</sup>Fire Chemistry Group, Centre for Fire, Explosives & Environment Safety, Delhi - 110054

<sup>6</sup>South Ural State University, Laboratory of Computational Modeling of Drugs, 454080, Russia

<sup>7</sup>Department of Chemistry, Aditi Mahavidyalaya, University of Delhi, Bawana, Delhi-110039 India

†These authors have contributed equally

### Corresponding Author

Poonam (poonam.chemistry@mirandahouse.ac.in); Vladimir Potemkin  
([potemkinva@susu.ru](mailto:potemkinva@susu.ru)); Brijesh Rathi (brijeshrathi@hrc.du.ac.in)

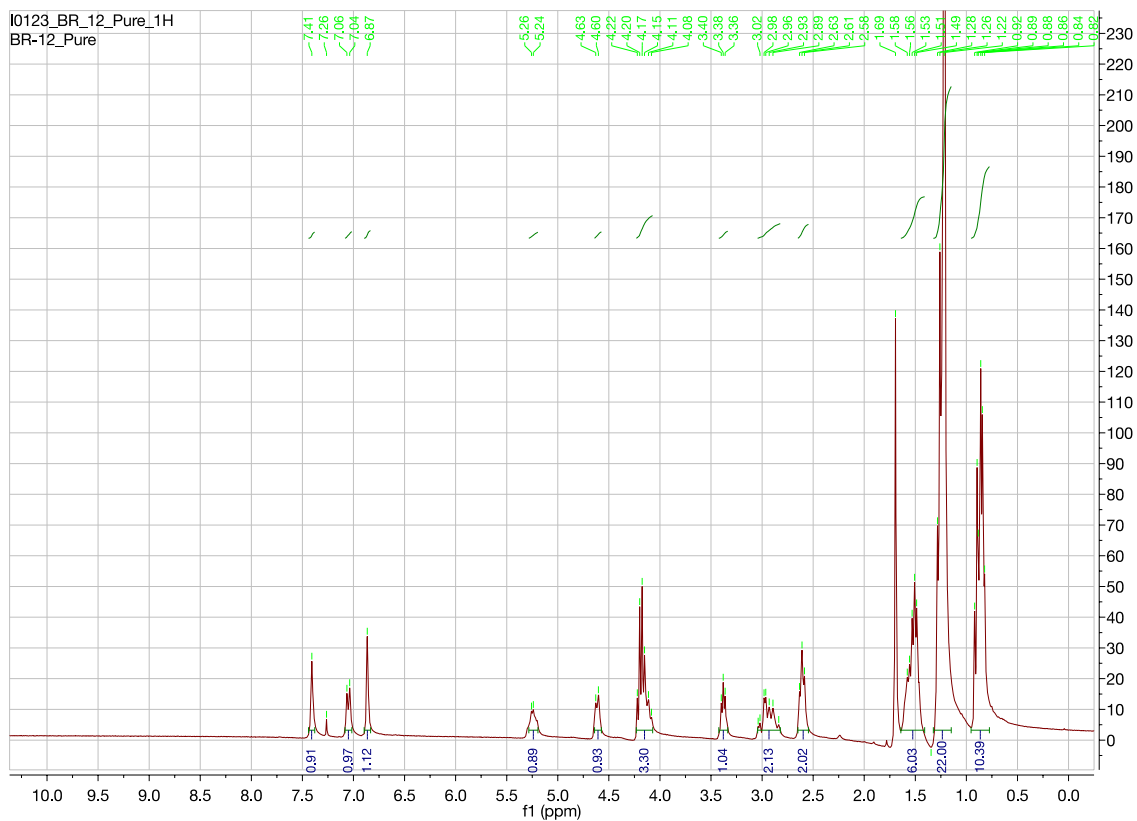

Fig. S1.  $^1\text{H}$  NMR (300 MHz)

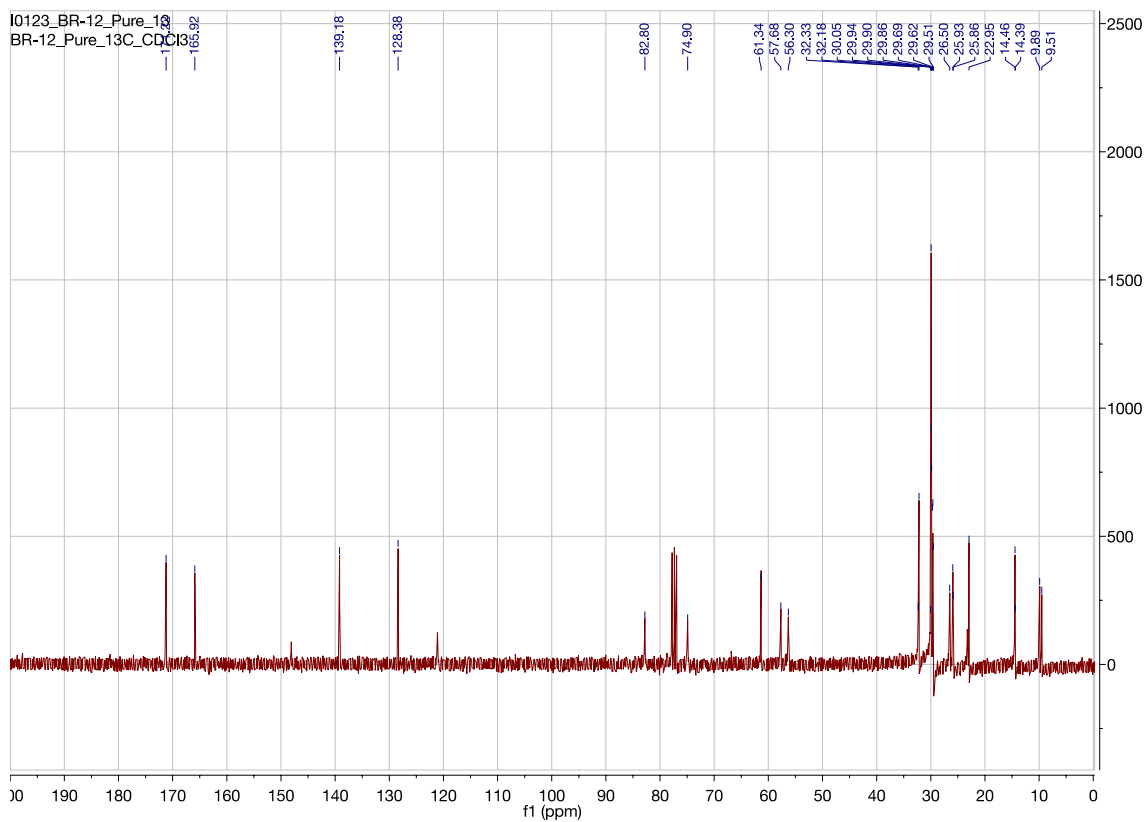

Fig. S2.  $^{13}\text{C}$  NMR for Compound 1.

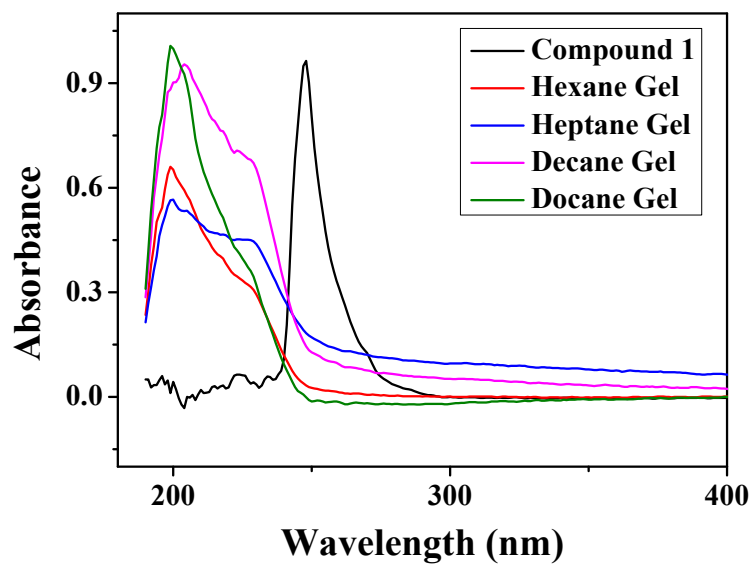

Fig. S3. UV-Visible Spectra for compound 1.

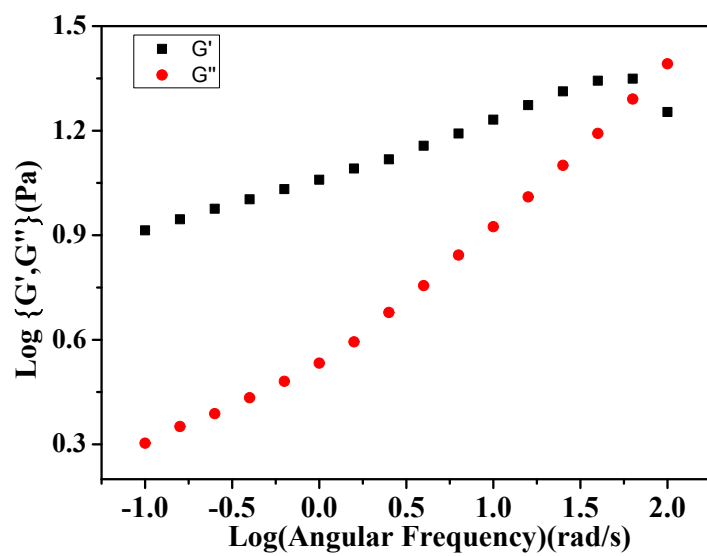

Fig. S4. Hexane frequency dependence studies of gelator 1

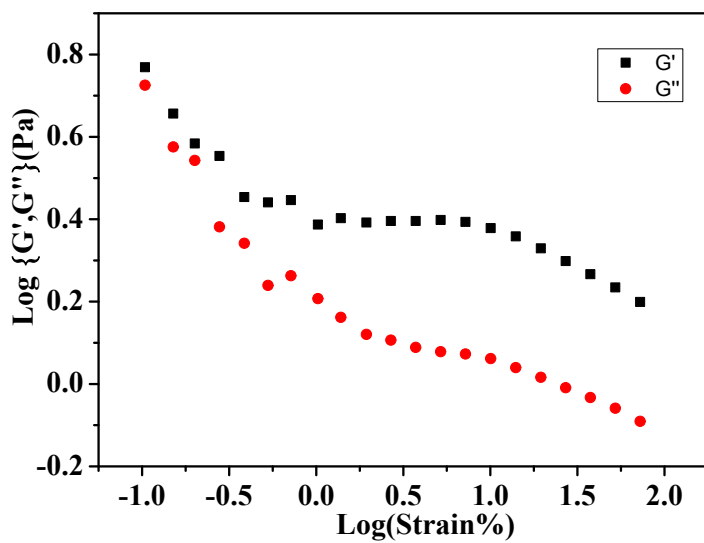

Fig. S5. Decane frequency dependence studies of gelator 1

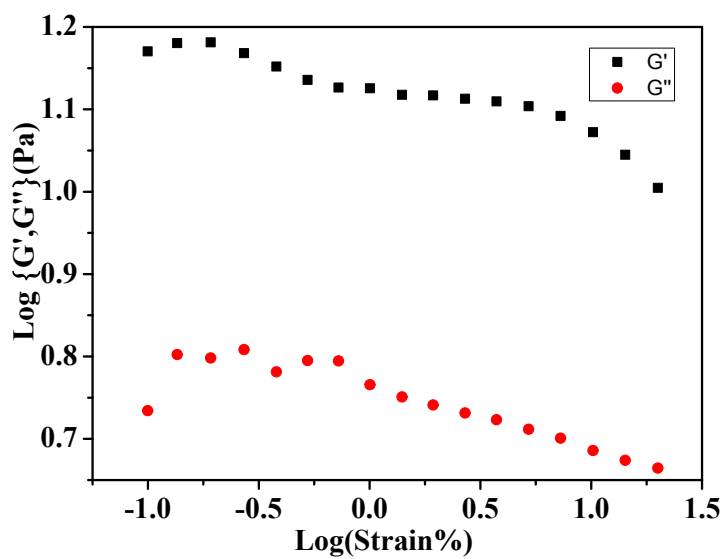

Fig. S6. Hexane strain and storage modulus for gelator 1.

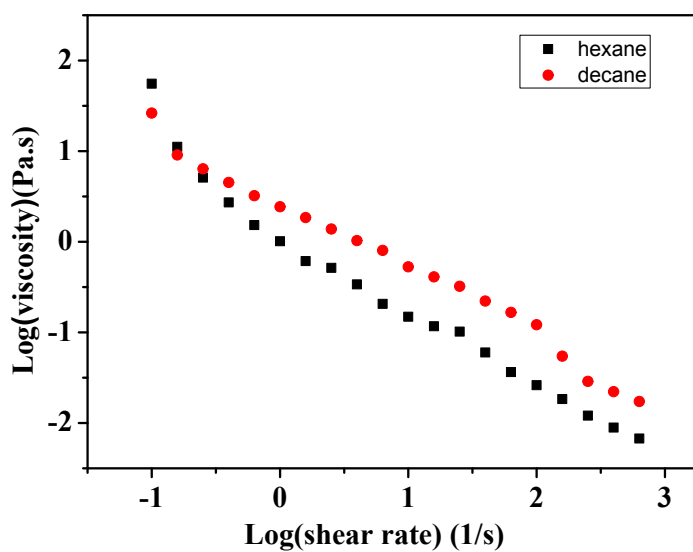

Fig. S7. Decane strain and storage modulus for gelator 1.

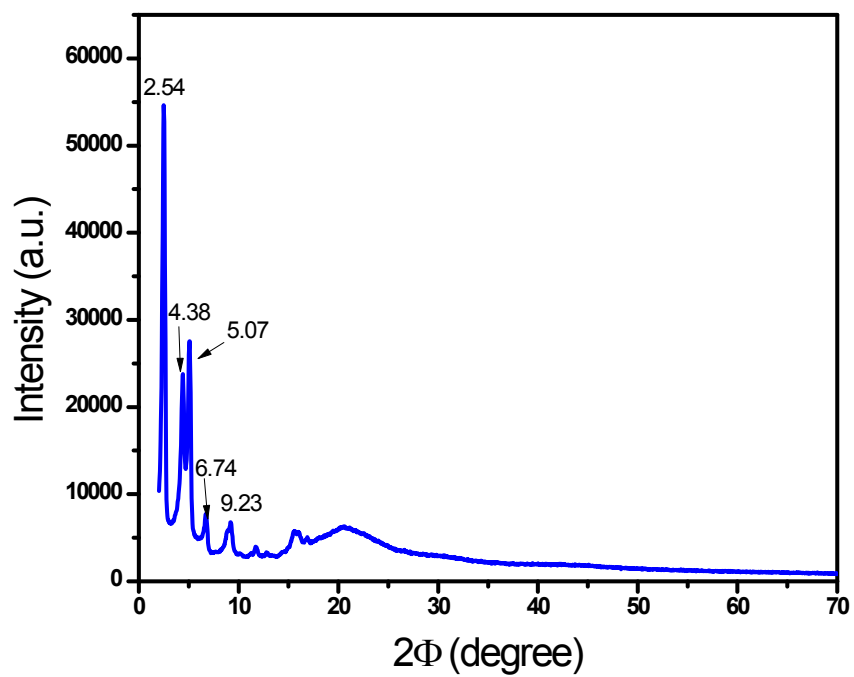

Fig. S8. Powder XRD of gelator 1.
